# Supplementary material
Source: PubMed Central journal article supplement (PMC1895572)
Supplement: blood_blood-2006-04-015933_1.pdf [file blood_blood-2006-04-015933_1.pdf]

| BALB/c                     |              |                                 |                 |                 |                     | ΔdblGATA |              |                 |                                  |                 |                     |  |
|----------------------------|--------------|---------------------------------|-----------------|-----------------|---------------------|----------|--------------|-----------------|----------------------------------|-----------------|---------------------|--|
| gender                     | Age<br>t = 0 | weight<br>t = 0                 | weight<br>6 wks | weight<br>9 wks | Δ (9wks<br>– 6 wks) | gender   | Age<br>t = 0 | weight<br>t = 0 | weight<br>6 wks                  | weight<br>9 wks | Δ (9wks – 6<br>wks) |  |
| <i>S. mansoni</i> infected |              |                                 |                 |                 |                     |          |              |                 |                                  |                 |                     |  |
| F                          | 10.0         | 19.87                           | 23.77           | 24.65           | +0.88               | F        | 14.0         | 21.55           | 25.84                            | 23.75           | -2.09               |  |
| F                          | 10.0         | 19.12                           | 22.61           | 23.18           | +0.57               | F        | 14.0         | 21.80           | 25.23                            | 23.30           | -1.93               |  |
| F                          | 10.0         | 21.02                           | 24.59           | 25.90           | +1.31               | F        | 13.7         | 21.07           | 24.26                            | 22.45           | -1.81               |  |
| F                          | 10.0         | 21.00                           | 24.91           | 25.55           | +0.64               | F        | 13.7         | 19.77           | 21.62                            | 21.07           | -0.55               |  |
| F                          | 10.0         | 19.56                           | 22.15           | 23.36           | +1.21               | F        | 13.0         | 20.47           | 24.50                            | 22.61           | -1.89               |  |
| F                          | 10.0         | 18.96                           | 21.06           | 21.38           | +0.32               | F        | 13.0         | 20.92           | 23.42                            | 23.83           | +0.41               |  |
|                            |              | <b>Average Δ +0.82 ± 0.16 g</b> |                 |                 |                     |          |              |                 | <b>Average Δ -1.31 ± 0.41 g*</b> |                 |                     |  |
| uninfected                 |              |                                 |                 |                 |                     |          |              |                 |                                  |                 |                     |  |
| F                          | 10.0         | 21.45                           | 23.57           | 24.96           | +1.39               | F        | 13.7         | 19.92           | 20.92                            | 22.03           | +1.11               |  |
| F                          | 10.0         | 18.52                           | 21.45           | 22.20           | +0.75               | F        | 13.7         | 20.53           | 22.70                            | 22.91           | +0.21               |  |
|                            |              |                                 |                 |                 |                     | F        | 13.7         | 21.04           | 22.58                            | 23.23           | +0.65               |  |
|                            |              | <b>Average Δ +1.07 ± 0.32 g</b> |                 |                 |                     |          |              |                 | <b>Average Δ +0.66 ± 0.26 g</b>  |                 |                     |  |
